# Supplementary material
Source: Springer Nature journal article supplement (https://www.springermedizin.de/resource/supplementary/12916_2013_853_MOESM4_ESM.pdf/9598514)

Venlafaxine/Fluoxetine placebo

(n= 413)

Venlafaxine  
(n = 3,498)

Fluoxetine  
(n = 2,056)

Venlafaxine placebo  
(n= 1,010)

Fluoxetine placebo  
(n= 482)

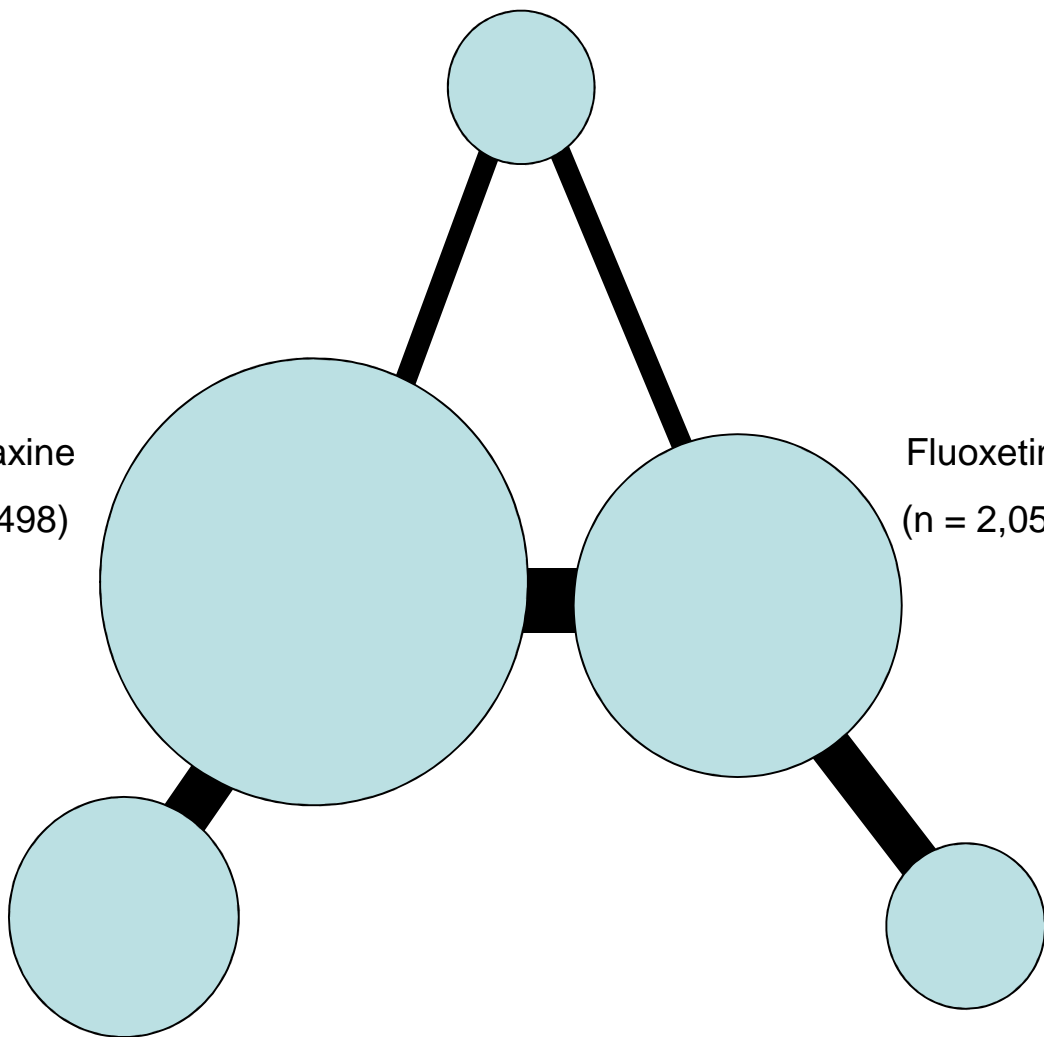

Supplement: MOESM4 [file 9598514]
